# Supplementary material for: Free-standing bilayered vanadium oxide films synthesized by liquid exfoliation of chemically preintercalated δ-LixV2O5·nH2O
Source: Royal Society of Chemistry journal article supplement (doi:10.1039/d1ma00085c), 2021-01-01
Supplement: d1ma00085c1.pdf [file d1ma00085c1.pdf]

## Supporting Information

### Freestanding bilayered vanadium oxide films synthesized by facile, liquid exfoliation of chemically preintercalated $\delta\text{-Li}_x\text{V}_2\text{O}_5 \cdot n\text{H}_2\text{O}$

Luke Houseman<sup>a</sup>, Santanu Mukherjee<sup>a</sup>, Ryan Andris<sup>a</sup>, Michael Zachman<sup>b</sup>,  
Ekaterina Pomerantseva<sup>a</sup>

<sup>a</sup> Department of Materials Science and Engineering, Drexel University, Philadelphia, PA, 19104, USA

<sup>b</sup> Center for Nanophase Materials Sciences, Oak Ridge National Laboratory, Oak Ridge, TN 37831, USA

\* Corresponding author: [ep423@drexel.edu](mailto:ep423@drexel.edu)

**Keywords:** liquid exfoliation; bilayered vanadium oxide; nanoflakes; freestanding film; electronic conductivity

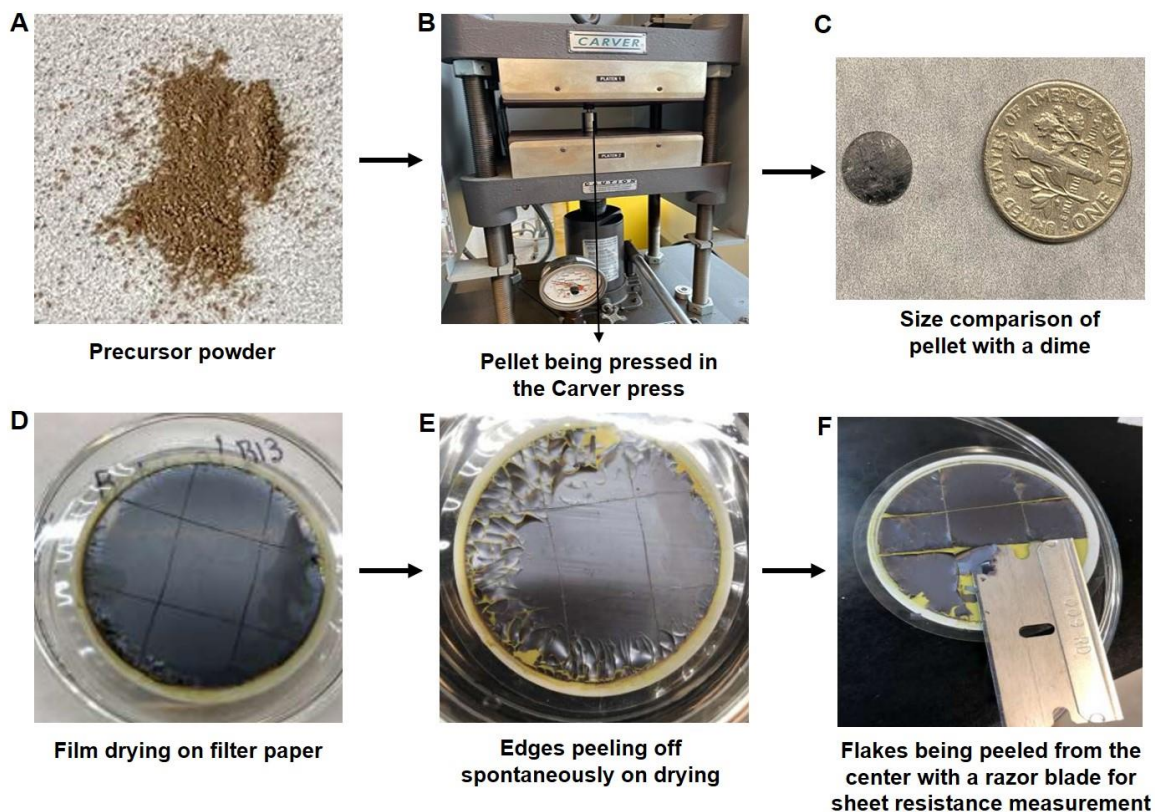

**Figure S1. Sample preparation process for sheet resistance measurement of (A-C) precursor powder and (D-F) freestanding film.** (A) Yellowish brown  $\delta\text{-Li}_x\text{V}_2\text{O}_5 \cdot n\text{H}_2\text{O}$  powder, (B) 10 mg of powder filled in the cavity of steel die and pressed at  $\sim 10,000$  kPa for 10-15 seconds, (C) Dark colored, circular pellet obtained, placed beside a dime for size comparison, (D) Dark colored film in the process of drying, (E) Dried film, demonstrating a deep brownish color, and flakes peeling off from the sides, (F) Flakes being gently removed with a razor blade for conductivity measurements.

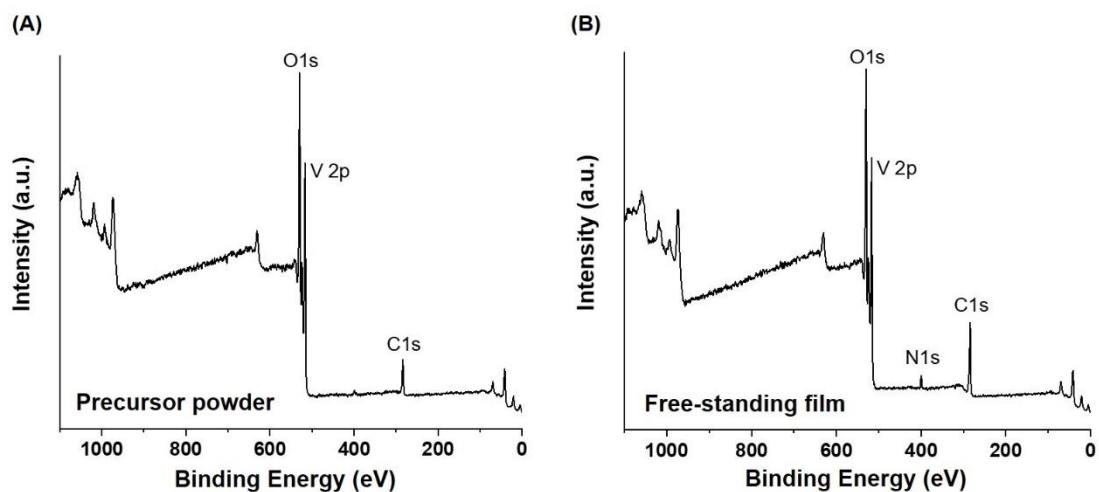

**Figure S2.** XPS survey scans of the (a) precursor powder and (b) free-standing film.

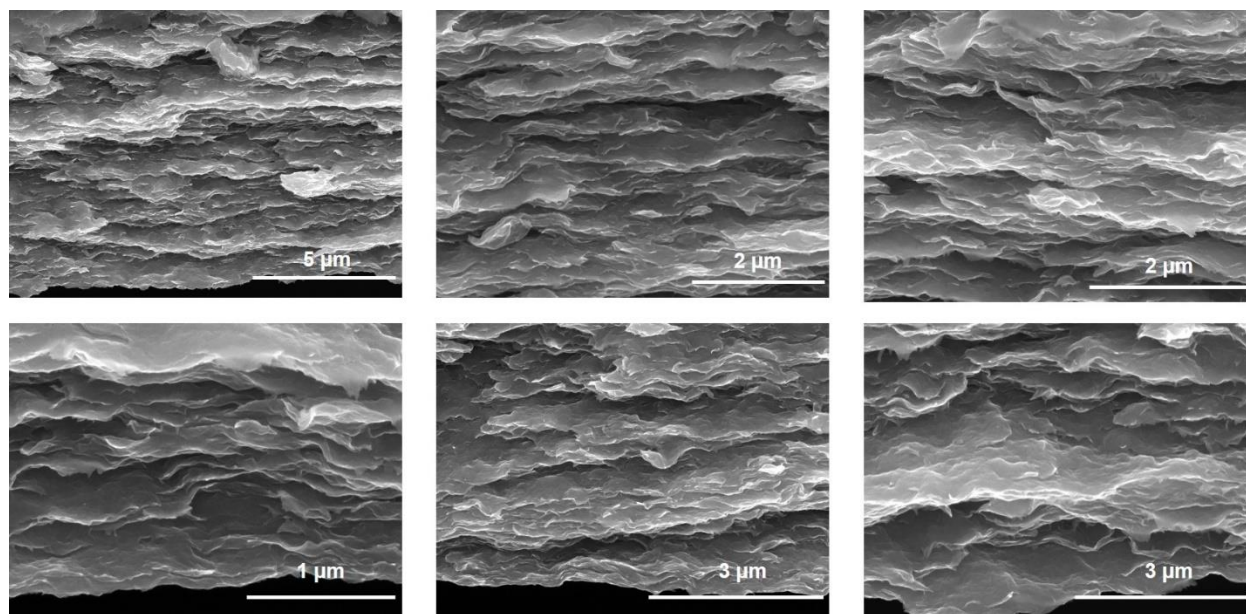

**Figure S3.** Additional cross-sectional SEM images of the freestanding film produced by exfoliation of  $\delta$ - $\text{Li}_x\text{V}_2\text{O}_5 \cdot n\text{H}_2\text{O}$  precursor powder followed by vacuum filtration.
